# Supplementary material for: Utilization of Flexible Ureteroscopy in Conjunction with Flexible Vacuum-Assisted Ureteral Access Sheath for the Management of 1-2cm Complex Lower Calyceal Calculi
Source: Research Square preprint supplement (doi:10.21203/rs.3.rs-6798114/v1), 2025-07-03
Supplement: Supplementary file 1 [file 7d1dd47779c50778a64f69dd.xlsx]

## Sheet: Sheet1
Group	SCR	Operative time	Hospital stay	Postoperative fever
A	1	58	2.8	0
A	1	63	3.1	0
A	1	67	3.5	0
A	1	61	3	0
A	1	72	3.6	0
A	1	55	2.9	0
A	1	69	3.4	0
A	1	64	3.2	0
A	1	59	2.7	0
A	1	76	3.7	0
A	1	50	2.5	0
A	1	66	3.3	0
A	1	71	3.8	0
A	1	53	2.6	0
A	1	68	3.4	0
A	1	62	3.1	0
A	1	57	2.8	0
A	1	74	3.9	0
A	1	49	2.4	0
A	1	65	3.2	0
A	1	70	3.6	0
A	1	54	2.7	0
A	1	60	3	0
A	1	78	4	0
A	1	47	2.3	0
A	1	63	3.3	0
A	1	66	3.5	0
A	1	58	2.9	0
A	0	73	3.7	0
A	0	51	2.6	0
A	0	67	3.4	0
A	0	62	3.1	0
A	0	69	3.5	0
A	0	56	2.5	0
A	0	64	3.2	0
A	0	80	3.9	0
B	1	68	2	0
B	1	79	2.4	0
B	1	85	2.8	0
B	1	62	3.2	0
B	1	77	3.5	0
B	1	71	3.7	0
B	0	94	3.9	0
B	1	58	4.1	0
B	1	83	4.2	0
B	1	66	4.3	0
B	1	72	4.5	0
B	1	89	4.6	1
B	1	54	4.7	0
B	1	76	4.8	0
B	0	81	4.9	0
B	0	63	5	0
B	0	70	5.1	0
B	0	97	5.2	0
B	0	49	5.3	0
B	0	74	5.4	0
B	0	88	5.5	0
B	0	57	5.6	0
B	1	69	5.7	0
B	0	103	5.8	1
B	0	52	5.9	0
B	0	78	6.1	0
B	1	82	6.2	0
B	0	60	6.4	0
B	0	75	6.6	0
B	1	91	6.8	1
B	0	45	7.2	0
B	1	73	7.5	0
B	0	112	8	1
