# Supplementary material for: Utilization of Flexible Ureteroscopy in Conjunction with Flexible Vacuum-Assisted Ureteral Access Sheath for the Management of 1-2cm Complex Lower Calyceal Calculi
Source: Research Square preprint supplement (doi:10.21203/rs.3.rs-6798114/v1), 2025-07-03
Supplement: Supplementary file 2 [file c1fce07de8bb4017ae94fcec.xlsx]

## Sheet: Sheet1
Group	Sex	Age	BMI	Stone diameter	CT value
A	1	45	23.1	1.7	1245
A	1	53	26.7	1.5	798
A	0	51	24.5	1.8	1523
A	1	42	27.8	1.4	635
A	0	49	22.3	2	1768
A	0	57	25.9	1.3	327
A	1	38	28.4	1.6	913
A	1	47	21.6	1.9	1427
A	1	55	29.1	1.2	485
A	1	44	19.8	1.6	1094
A	0	50	24.9	1.7	872
A	1	48	26.2	1.5	1632
A	0	46	23.7	1.9	412
A	1	52	25.3	1.3	1186
A	0	43	27.1	2	754
A	1	56	20.5	1.1	1339
A	0	41	30.2	1.8	692
A	0	59	22.9	1.4	1025
A	0	37	24	1.7	945
A	1	48	28.9	1.5	1284
A	0	54	18.7	1.6	572
A	0	47	26.5	1.9	996
A	1	50	23.4	1.2	834
A	1	39	31.3	1.7	1486
A	0	61	19.2	1.4	379
A	1	34	25.6	1.8	1127
A	1	51	27.5	1.3	708
A	0	44	22.1	1.6	881
A	0	53	29.7	1.5	1094
A	1	28	24.8	2	923
A	0	58	26.8	1.4	1159
A	1	47	23.9	1.7	803
A	0	50	25.1	1.6	1375
A	1	49	30.8	1.9	621
A	1	55	21.3	1.5	1042
A	0	22	28	1.8	957
B	1	55	24.3	1.8	424
B	1	47	27.6	1.6	453
B	1	51	25.8	1.9	486
B	0	43	29.1	1.5	673
B	1	58	23.5	2	694
B	0	36	26.9	1.4	718
B	0	49	28.7	1.7	734
B	1	53	22.4	2	750
B	0	62	30.5	1.3	766
B	1	29	20.9	1.7	780
B	1	50	25.2	1.8	783
B	0	48	27.3	1.6	799
B	0	44	24.7	2	838
B	0	57	26.4	1.4	854
B	1	41	28.2	2	869
B	0	60	21.1	1.2	897
B	1	33	31.8	1.9	971
B	1	52	23.9	1.5	987
B	1	46	25.5	1.8	1004
B	0	61	29.6	1.6	1017
B	0	24	19.3	1.7	1037
B	1	54	27.1	2	1060
B	0	45	24.6	1.3	1068
B	1	59	32.7	1.8	1091
B	1	27	18.8	1.5	1110
B	0	56	26.3	1.9	1149
B	1	39	28.9	1.4	1166
B	1	63	22.7	1.7	1169
B	0	22	30.1	1.6	1187
B	1	51	25.7	2	1218
B	1	50	27.8	1.5	1248
B	0	47	24.9	1.8	1291
B	0	38	26.6	1.7	1401
